# Supplementary material for: Defective heart chamber growth and myofibrillogenesis after knockout of adprhl1 gene function by targeted disruption of the ancestral catalytic active site
Source: PubMed Central journal article supplement (PMC7390403; doi:10.1371/journal.pone.0235433), 2020-07-29

**S5.**

*Adprh1* morpholinos - Position, sequence and activity in embryos

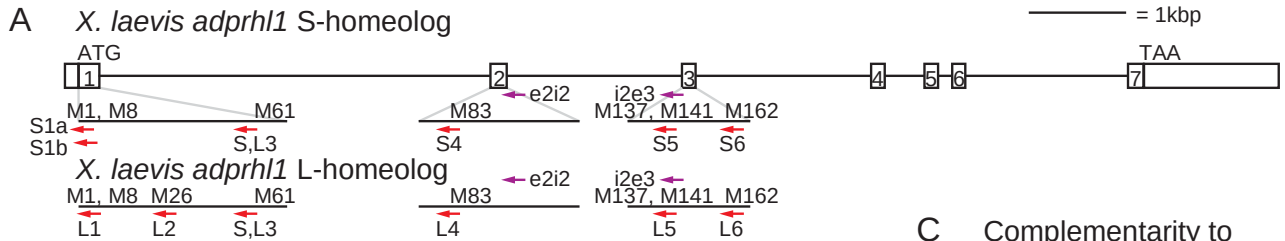

**B** Morpholino sequences

| ATG               | Morpholino          | Sequence 5'-3'              | Complementarity (n/25) |            |
|-------------------|---------------------|-----------------------------|------------------------|------------|
|                   |                     |                             | S-                     | L-homeolog |
| S1a               | Adprh1-ATGMO1(S1a)  | CCTTAAACTTCTCCATAGCAAGGGC   | 25                     | 23         |
| S1b               | Adprh1-ATGMO1(S1b)  | TGCAGCCTTAAACTTCTCCATAGCA   | 25                     | 22         |
| L1                | Adprh1-ATGMO1(L1)   | CATCGCAGCCTTAAACTTCTCCATG   | 23                     | 25         |
| L2                | Adprh1-ATGMO2(L2)   | GGATCTTTACTCCTGAAACACACAT   | 19                     | 25         |
| S,L3              | Adprh1-ATGMO3(S,L3) | ATTAGAGTATTGTTACTCACTGGCC   | 25                     | 25         |
| S4                | Adprh1-ATGMO4(S4)   | GTTTTACCATGTCACGGTACAGGTC   | 25                     | 23         |
| L4                | Adprh1-ATGMO4(L4)   | GTTTCACCATGTCACGATACAGGTC   | 23                     | 25         |
| S5                | Adprh1-ATGMO5(S5)   | AGTATCTCATCCCAATACACATGGC   | 25                     | 24         |
| L5                | Adprh1-ATGMO5(L5)   | AGTATTTTCATCCCAATACACATGGC  | 24                     | 25         |
| S6                | Adprh1-ATGMO6(S6)   | GATGGTTATGAGTCATTCTCCCACT   | 25                     | 24         |
| L6                | Adprh1-ATGMO6(L6)   | GATGGTTATGCGTCATTCTCCCACT   | 24                     | 25         |
| S6Mis             | Adprh1-ATGMO6Mis    | GATAGTTATAAGTAATTCTACCAAT   | 20                     | 19         |
| <b>RNA-splice</b> |                     |                             |                        |            |
| e2i2              | Adprh1-e2i2MO       | AGGCTCAGCATCTTACAAACCTTTT   | 23                     | 25*        |
| e2i2Mis           | Adprh1-e2i2MOMis    | AAGCTAAGCATATTAAAAACATTTT   | 18                     | 20         |
| i2e3              | Adprh1-i2e3MO       | ACCTAAGAAACAACACTAGAGTCACTG | 23                     | 25*        |
| i2e3Mis           | Adprh1-i2e3MOMis    | AACTAAAAACAATAGATCAATG      | 18                     | 20         |

**C** Complementarity to ADP-ribosylhydrolase gene family members

|                          | Complementarity (n/25)   |                          |                          |                          |                          |
|--------------------------|--------------------------|--------------------------|--------------------------|--------------------------|--------------------------|
|                          | <i>adprh1-like.2.1.S</i> | <i>adprh1-like.2.1.S</i> | <i>adprh1-like.2.1.S</i> | <i>adprh1-like.2.1.S</i> | <i>adprh1-like.2.1.S</i> |
| <i>adprh1.S</i>          | 17                       | 17                       | 17                       | x                        | 9                        |
| <i>adprh1.L</i>          | 17                       | 17                       | 17                       | x                        | 9                        |
| <i>adprh1-like.2.1.S</i> | 19                       | 19                       | 19                       | x                        | x                        |
| <i>adprh1-like.2.1.S</i> | 18                       | 18                       | 18                       | x                        | x                        |
| <i>adprh1-like.2.1.S</i> | 23                       | 21                       | 20                       | 20                       | 12                       |
| <i>adprh1-like.2.1.S</i> | 22                       | 20                       | 20                       | 20                       | 12                       |
| <i>adprh1-like.2.1.S</i> | 19                       | 17                       | 15                       | 15                       | 11                       |

**D** Effect of morpholinos on embryo development

(injection at 1-cell stage)

Key

- Heart defect 1 - inert ventricle
- Heart defect 2 - (beating) ventricle malformations
- Tail defect
- Other malformations
- Normal morphology

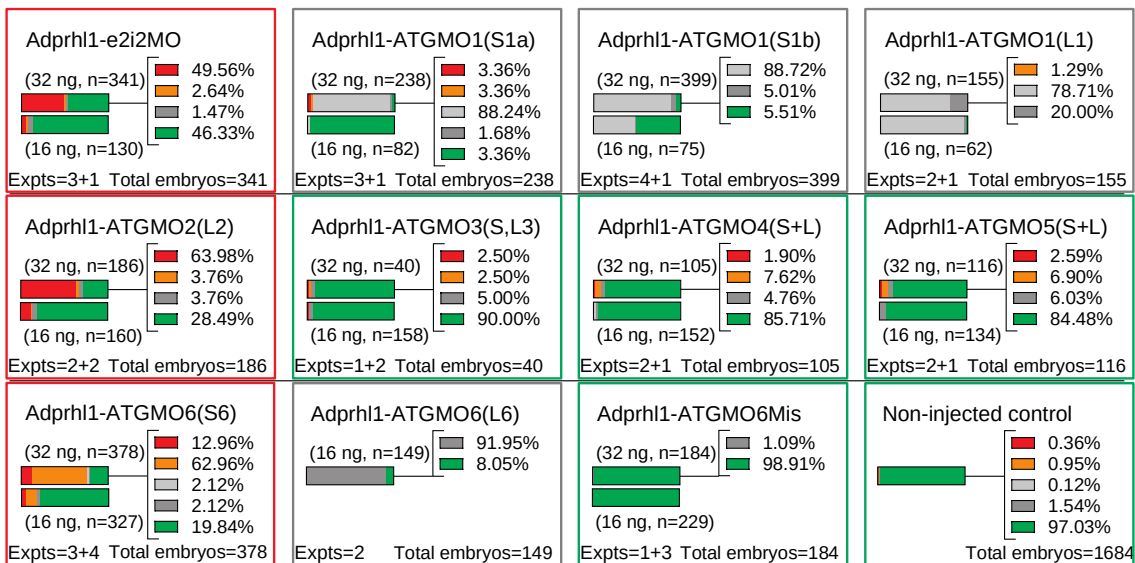

Supplement: pone.0235433.s005.pdf [file pone.0235433.s005.pdf]
