# Supplementary material for: Defective heart chamber growth and myofibrillogenesis after knockout of adprhl1 gene function by targeted disruption of the ancestral catalytic active site
Source: PubMed Central journal article supplement (PMC7390403; doi:10.1371/journal.pone.0235433), 2020-07-29

**S7.**

**Activity of distinct Cas9 RNAs and protein for *tyrosinase* gene knockout in *X. laevis* embryos**

**A**  
RNA:

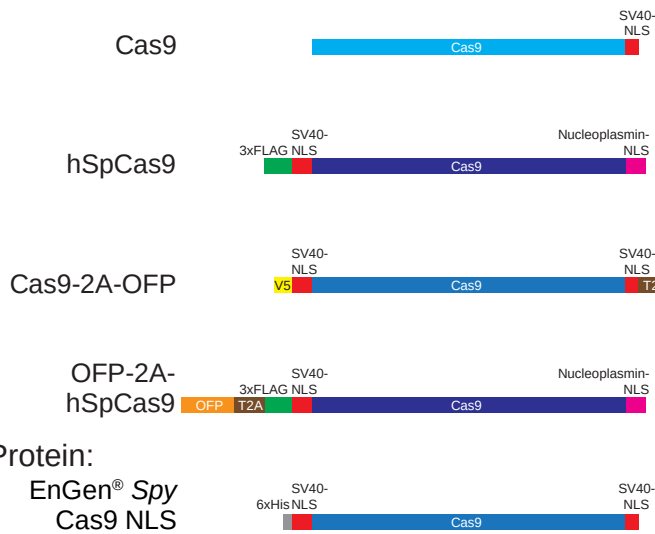

Protein:

EnGen® *Spy*  
Cas9-NLS

Cas9 (Addgene:47322) and Cas9-2A-OFP (GeneArt:A21174) share 77% Cas9 nucleotide sequence conservation

**B**

| Source            | Cas9 Nucleotide Sequence Conservation | <i>Tyrosinase</i> gene knockout efficiency                                                                                                                                                                                                                                                 |                 |        |               |        |                  |        |                  |        |           |       |
|-------------------|---------------------------------------|--------------------------------------------------------------------------------------------------------------------------------------------------------------------------------------------------------------------------------------------------------------------------------------------|-----------------|--------|---------------|--------|------------------|--------|------------------|--------|-----------|-------|
| Addgene: 47322    | 80%                                   | <table border="1"> <tr><td>Complete albino</td><td>0.80%</td></tr> <tr><td>Nearly albino</td><td>5.60%</td></tr> <tr><td>Partial albino 1</td><td>69.60%</td></tr> <tr><td>Partial albino 2</td><td>24.00%</td></tr> <tr><td>Pigmented</td><td>0.00%</td></tr> </table> Total embryos=125  | Complete albino | 0.80%  | Nearly albino | 5.60%  | Partial albino 1 | 69.60% | Partial albino 2 | 24.00% | Pigmented | 0.00% |
| Complete albino   | 0.80%                                 |                                                                                                                                                                                                                                                                                            |                 |        |               |        |                  |        |                  |        |           |       |
| Nearly albino     | 5.60%                                 |                                                                                                                                                                                                                                                                                            |                 |        |               |        |                  |        |                  |        |           |       |
| Partial albino 1  | 69.60%                                |                                                                                                                                                                                                                                                                                            |                 |        |               |        |                  |        |                  |        |           |       |
| Partial albino 2  | 24.00%                                |                                                                                                                                                                                                                                                                                            |                 |        |               |        |                  |        |                  |        |           |       |
| Pigmented         | 0.00%                                 |                                                                                                                                                                                                                                                                                            |                 |        |               |        |                  |        |                  |        |           |       |
| Addgene: 51815    | 100%                                  | <table border="1"> <tr><td>Complete albino</td><td>24.24%</td></tr> <tr><td>Nearly albino</td><td>22.51%</td></tr> <tr><td>Partial albino 1</td><td>43.94%</td></tr> <tr><td>Partial albino 2</td><td>3.25%</td></tr> <tr><td>Pigmented</td><td>6.06%</td></tr> </table> Total embryos=462 | Complete albino | 24.24% | Nearly albino | 22.51% | Partial albino 1 | 43.94% | Partial albino 2 | 3.25%  | Pigmented | 6.06% |
| Complete albino   | 24.24%                                |                                                                                                                                                                                                                                                                                            |                 |        |               |        |                  |        |                  |        |           |       |
| Nearly albino     | 22.51%                                |                                                                                                                                                                                                                                                                                            |                 |        |               |        |                  |        |                  |        |           |       |
| Partial albino 1  | 43.94%                                |                                                                                                                                                                                                                                                                                            |                 |        |               |        |                  |        |                  |        |           |       |
| Partial albino 2  | 3.25%                                 |                                                                                                                                                                                                                                                                                            |                 |        |               |        |                  |        |                  |        |           |       |
| Pigmented         | 6.06%                                 |                                                                                                                                                                                                                                                                                            |                 |        |               |        |                  |        |                  |        |           |       |
| GeneArt: A21174   | 86%                                   | <table border="1"> <tr><td>Complete albino</td><td>6.28%</td></tr> <tr><td>Nearly albino</td><td>69.96%</td></tr> <tr><td>Partial albino 1</td><td>12.11%</td></tr> <tr><td>Partial albino 2</td><td>11.66%</td></tr> <tr><td>Pigmented</td><td>0.00%</td></tr> </table> Total embryos=223 | Complete albino | 6.28%  | Nearly albino | 69.96% | Partial albino 1 | 12.11% | Partial albino 2 | 11.66% | Pigmented | 0.00% |
| Complete albino   | 6.28%                                 |                                                                                                                                                                                                                                                                                            |                 |        |               |        |                  |        |                  |        |           |       |
| Nearly albino     | 69.96%                                |                                                                                                                                                                                                                                                                                            |                 |        |               |        |                  |        |                  |        |           |       |
| Partial albino 1  | 12.11%                                |                                                                                                                                                                                                                                                                                            |                 |        |               |        |                  |        |                  |        |           |       |
| Partial albino 2  | 11.66%                                |                                                                                                                                                                                                                                                                                            |                 |        |               |        |                  |        |                  |        |           |       |
| Pigmented         | 0.00%                                 |                                                                                                                                                                                                                                                                                            |                 |        |               |        |                  |        |                  |        |           |       |
| Produced in house | 100%                                  | <table border="1"> <tr><td>Complete albino</td><td>0.99%</td></tr> <tr><td>Nearly albino</td><td>6.95%</td></tr> <tr><td>Partial albino 1</td><td>71.52%</td></tr> <tr><td>Partial albino 2</td><td>14.57%</td></tr> <tr><td>Pigmented</td><td>5.96%</td></tr> </table> Total embryos=302  | Complete albino | 0.99%  | Nearly albino | 6.95%  | Partial albino 1 | 71.52% | Partial albino 2 | 14.57% | Pigmented | 5.96% |
| Complete albino   | 0.99%                                 |                                                                                                                                                                                                                                                                                            |                 |        |               |        |                  |        |                  |        |           |       |
| Nearly albino     | 6.95%                                 |                                                                                                                                                                                                                                                                                            |                 |        |               |        |                  |        |                  |        |           |       |
| Partial albino 1  | 71.52%                                |                                                                                                                                                                                                                                                                                            |                 |        |               |        |                  |        |                  |        |           |       |
| Partial albino 2  | 14.57%                                |                                                                                                                                                                                                                                                                                            |                 |        |               |        |                  |        |                  |        |           |       |
| Pigmented         | 5.96%                                 |                                                                                                                                                                                                                                                                                            |                 |        |               |        |                  |        |                  |        |           |       |
| NEB: M0646M       | NA                                    | <table border="1"> <tr><td>Complete albino</td><td>72.92%</td></tr> <tr><td>Nearly albino</td><td>8.33%</td></tr> <tr><td>Partial albino 1</td><td>17.71%</td></tr> <tr><td>Partial albino 2</td><td>1.04%</td></tr> <tr><td>Pigmented</td><td>0.00%</td></tr> </table> Total embryos=192  | Complete albino | 72.92% | Nearly albino | 8.33%  | Partial albino 1 | 17.71% | Partial albino 2 | 1.04%  | Pigmented | 0.00% |
| Complete albino   | 72.92%                                |                                                                                                                                                                                                                                                                                            |                 |        |               |        |                  |        |                  |        |           |       |
| Nearly albino     | 8.33%                                 |                                                                                                                                                                                                                                                                                            |                 |        |               |        |                  |        |                  |        |           |       |
| Partial albino 1  | 17.71%                                |                                                                                                                                                                                                                                                                                            |                 |        |               |        |                  |        |                  |        |           |       |
| Partial albino 2  | 1.04%                                 |                                                                                                                                                                                                                                                                                            |                 |        |               |        |                  |        |                  |        |           |       |
| Pigmented         | 0.00%                                 |                                                                                                                                                                                                                                                                                            |                 |        |               |        |                  |        |                  |        |           |       |

**Key to albino severity**

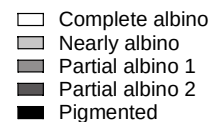

**C** Example albino tadpoles

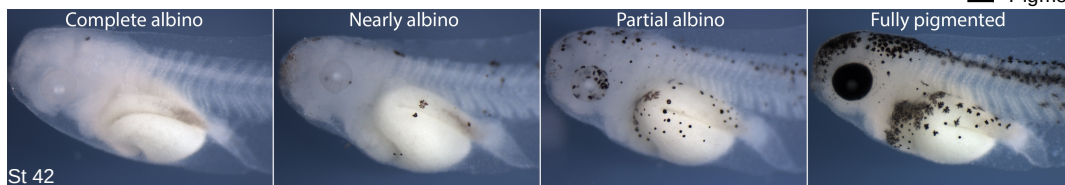

Class definitions are equivalent to Guo *et al* (2014) Development 141(3):707-14, figure 5O-R.

|                                  |                                                                      |
|----------------------------------|----------------------------------------------------------------------|
| Complete albino: 100% albino.    | No pigmented cells present in stage 42 tadpole.                      |
| Nearly albino: >90% albino.      | No pigmented cells in the eyes (retinal pigment epithelium).         |
| Partial albino 1: ~51-90% albino | Few pigmented cells (melanocytes) in the tail.                       |
| Partial albino 2: ~5-50% albino  | Some pigmented cells in the eyes and tail.                           |
| Fully pigmented: 0% albino.      | Mostly pigmented. Few bare patches visible within the eyes' pigment. |
|                                  | Fully pigmented. No bare patches visible within the eyes' pigment.   |

The 'partial albino' definition encompasses a broad range of pigment-loss phenotypes and hence was divided into two groups.

**D** Timed series during a single injection experiment with Cas9 protein

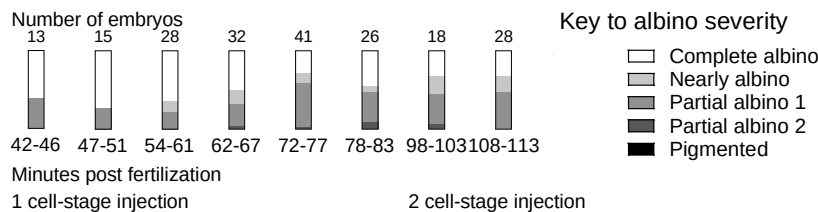

Supplement: pone.0235433.s007.pdf [file pone.0235433.s007.pdf]
