# Supplementary material for: Defective heart chamber growth and myofibrillogenesis after knockout of adprhl1 gene function by targeted disruption of the ancestral catalytic active site
Source: PubMed Central journal article supplement (PMC7390403; doi:10.1371/journal.pone.0235433), 2020-07-29

**S1.**

*Xenopus laevis adprhl1* transcripts and expression detected by exon-specific probes

**A** All *adprhl1* transcript alignments showing exon and intron sizes

*X. laevis* - JGI 9.2 jbrowse source

*adprhl1.S*

NM\_001093322.1, NP\_001086791.1, also rna29777 354 aa, 40 kDa

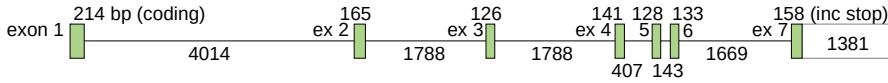

*adprhl1.L*

XM\_018247162.1, XP\_018102651.1 354 aa, 40 kDa

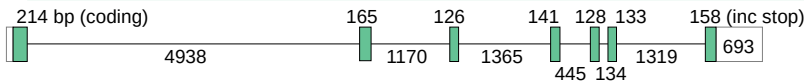

XM\_018247163.1, XP\_018102652.1 309 aa, 35 kDa

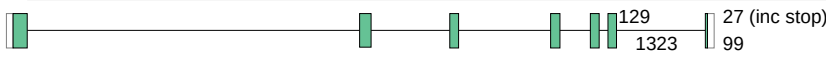

XM\_018247161.1, XP\_018102650.1 1049 aa, 118 kDa

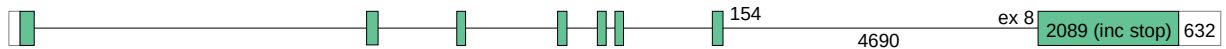

rna10651 982 aa, 111 kDa

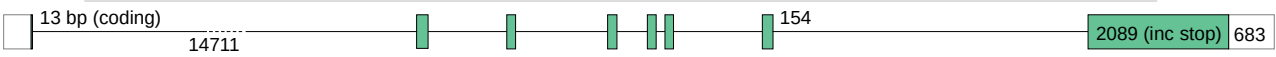

exon 8 L-p1 ← ← L-p2

**B-N** Adjacent pairs of exons (1-7) produce strong signals but exon 8 probes do not

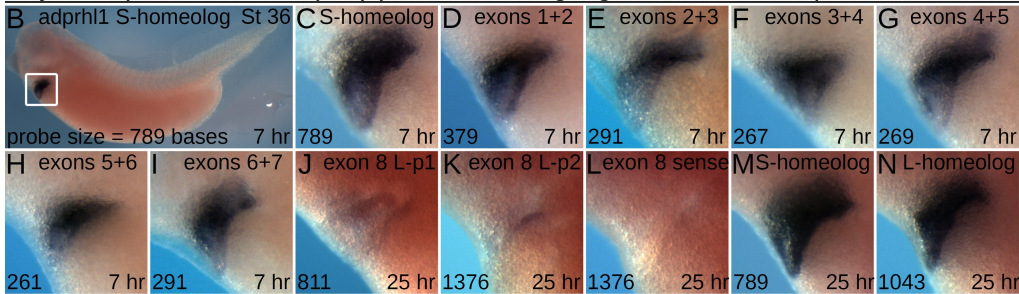

**O-U** Individual exons 1-7 produce weak signals due to their short length

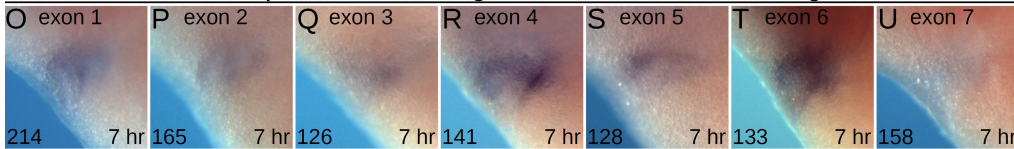

**V** 40 kDa Adprhl1 protein - exon contribution and antibody epitope position

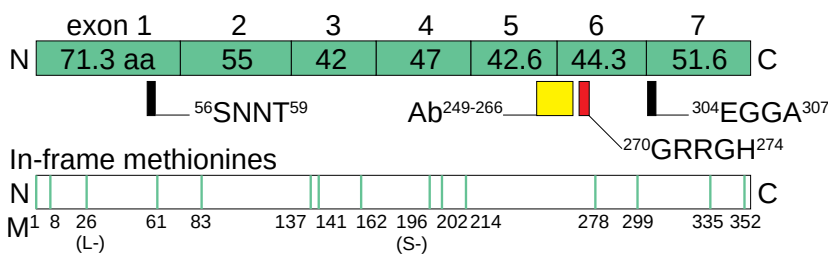

Supplement: pone.0235433.s001.pdf [file pone.0235433.s001.pdf]
