# Supplementary material for: Defective heart chamber growth and myofibrillogenesis after knockout of adprhl1 gene function by targeted disruption of the ancestral catalytic active site
Source: PubMed Central journal article supplement (PMC7390403; doi:10.1371/journal.pone.0235433), 2020-07-29

S2.

Limited recovery of cardiac myofibril assembly in *adprh1* morpholino injected embryos by transgenic synthesis of recombinant 40 KDa Adprh1 proteins

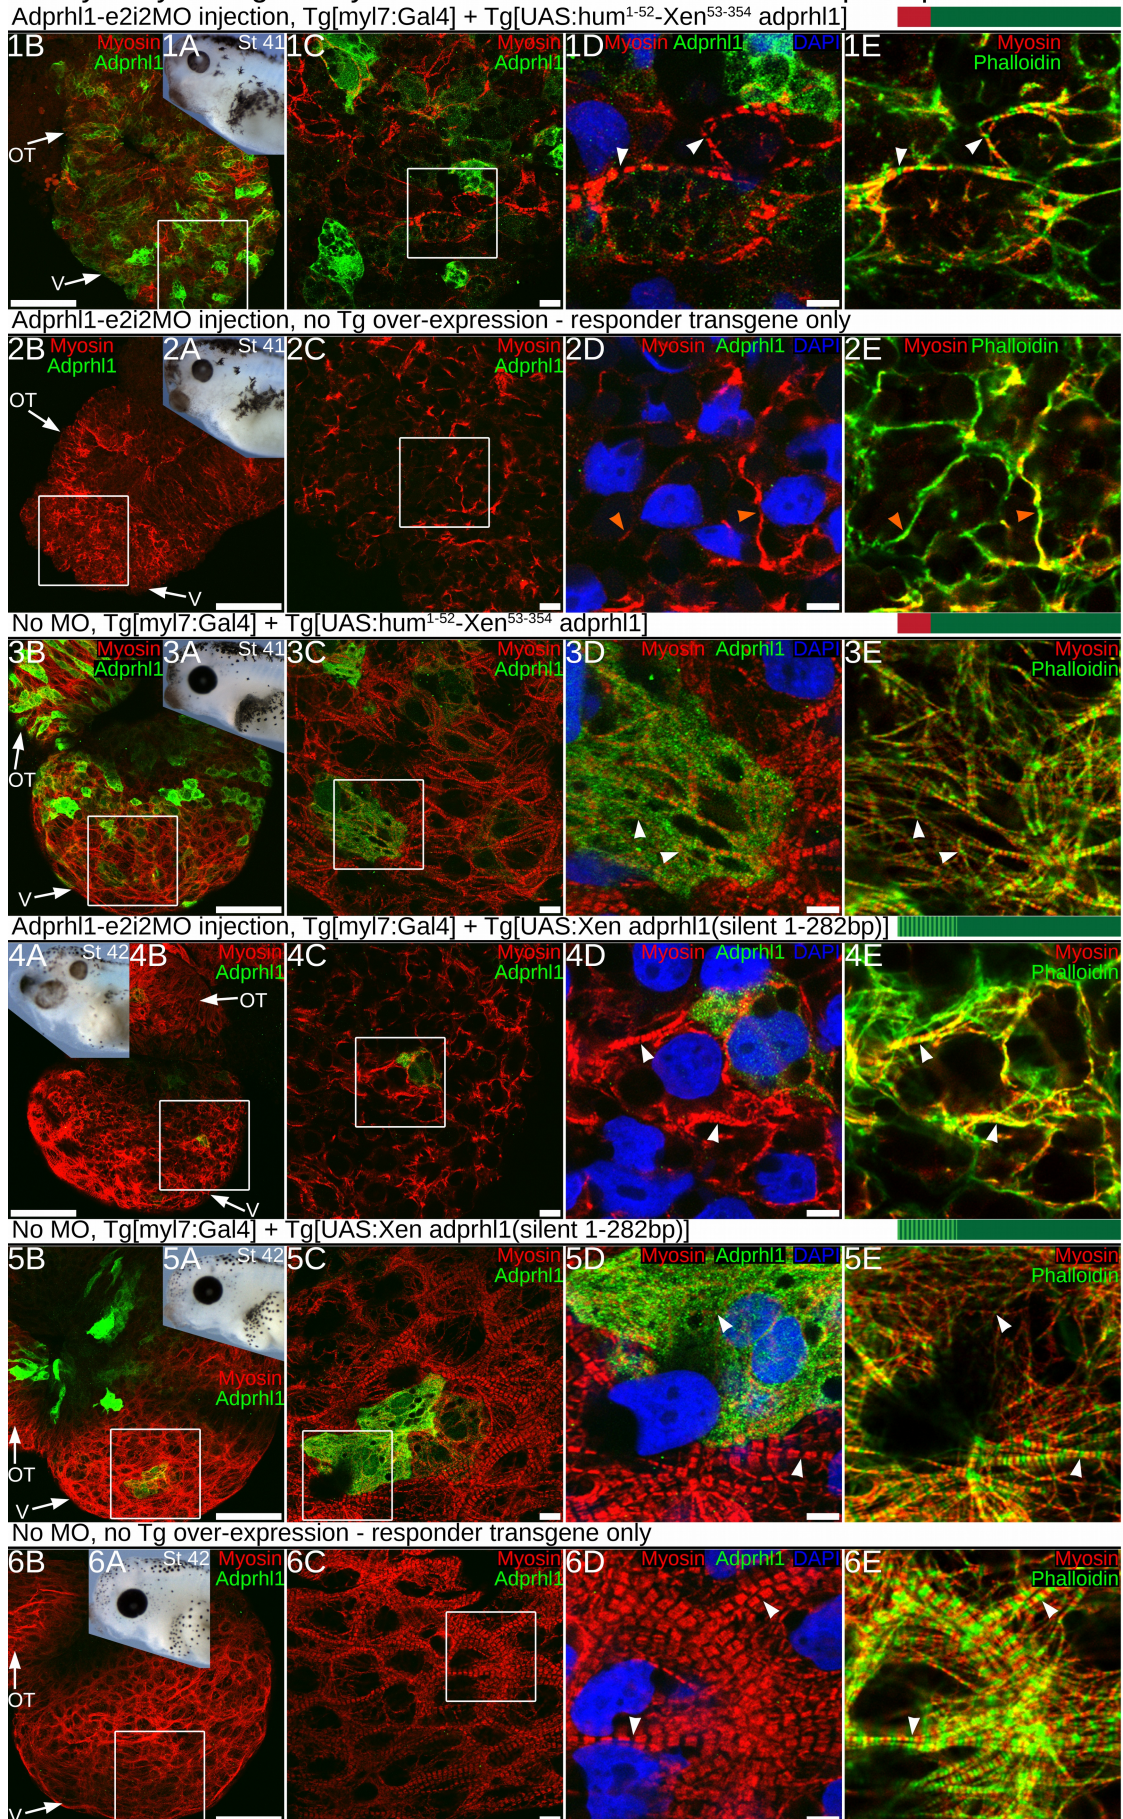

Supplement: pone.0235433.s002.pdf [file pone.0235433.s002.pdf]
