# Supplementary material for: Defective heart chamber growth and myofibrillogenesis after knockout of adprhl1 gene function by targeted disruption of the ancestral catalytic active site
Source: PubMed Central journal article supplement (PMC7390403; doi:10.1371/journal.pone.0235433), 2020-07-29

**S3.**

Over-expression of recombinant 40 kDa Adprh1 does not yield extra 23 kDa Adprh1

Tg[myl7:Gal4] + Tg[UAS:adprh1\*]

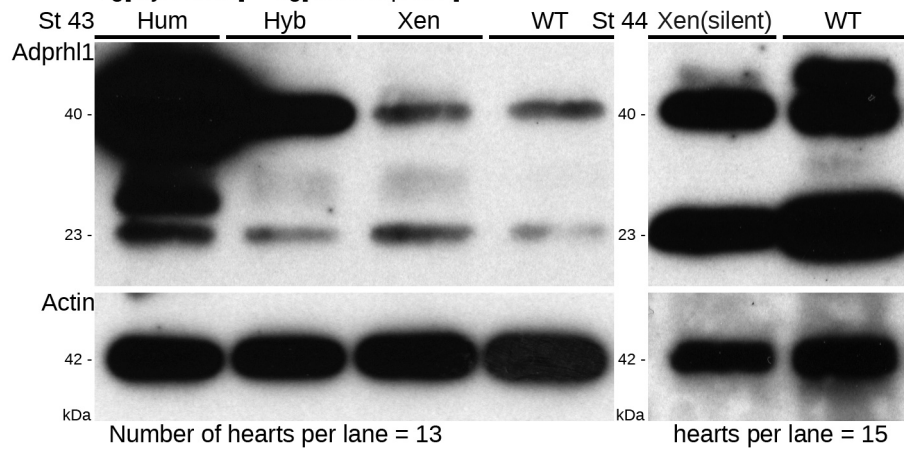

Supplement: pone.0235433.s003.pdf [file pone.0235433.s003.pdf]
