# Supplementary material for: Defective heart chamber growth and myofibrillogenesis after knockout of adprhl1 gene function by targeted disruption of the ancestral catalytic active site
Source: PubMed Central journal article supplement (PMC7390403; doi:10.1371/journal.pone.0235433), 2020-07-29

**S4.**

**Excess Adprh1 production and mitosis are not linked**

Tg[myl7:Gal4] + Tg[UAS:Xen *adprh1*(silent 1-282bp)]

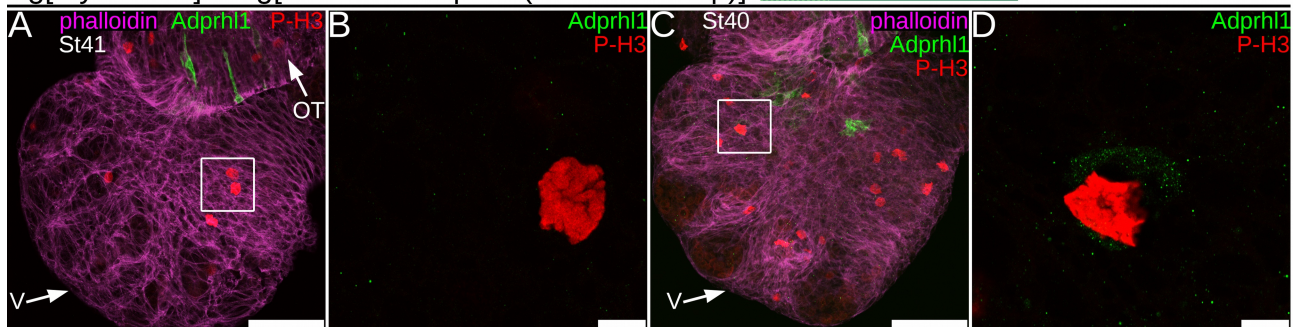

**Excess Adprh1 production does not cause cell death**

Tg[myl7:Gal4] + Tg[UAS:Xen *adprh1*(silent 1-282bp)]

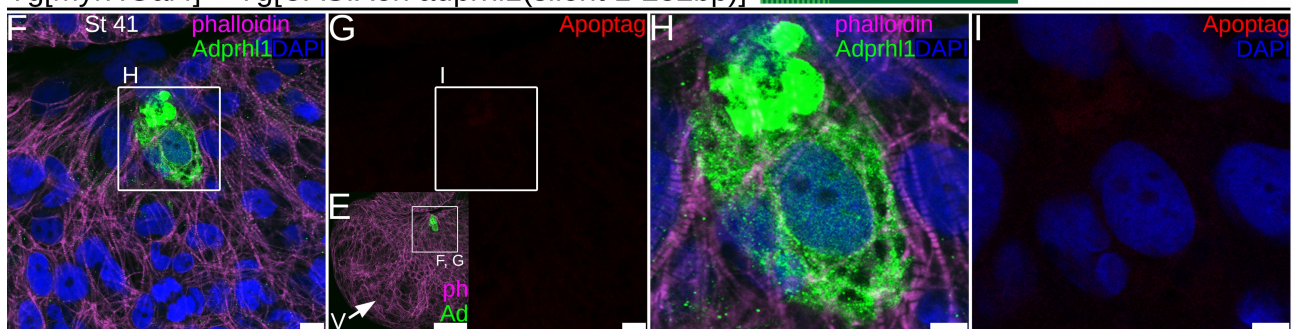

**Rare apoptotic cell within a heart ventricle**

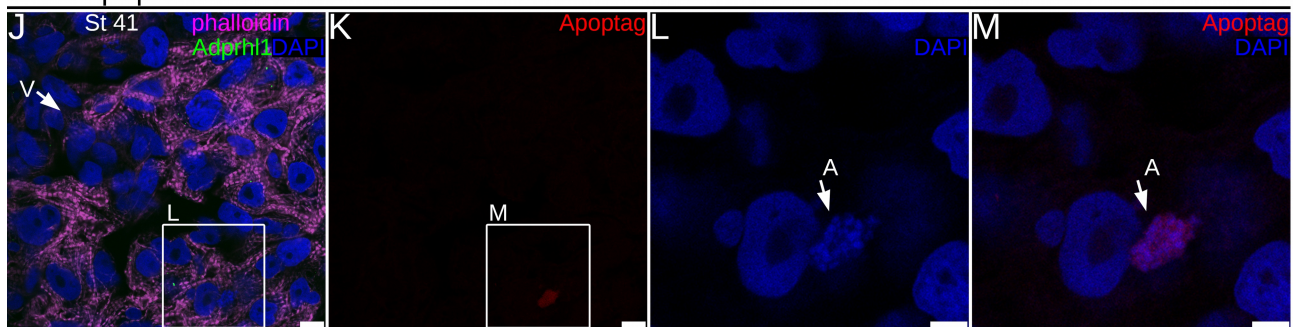

**Tg[myl7:Gal4] + Tg[UAS:M2(H37A)] toxic ion channel (induced necrotic cell death)**

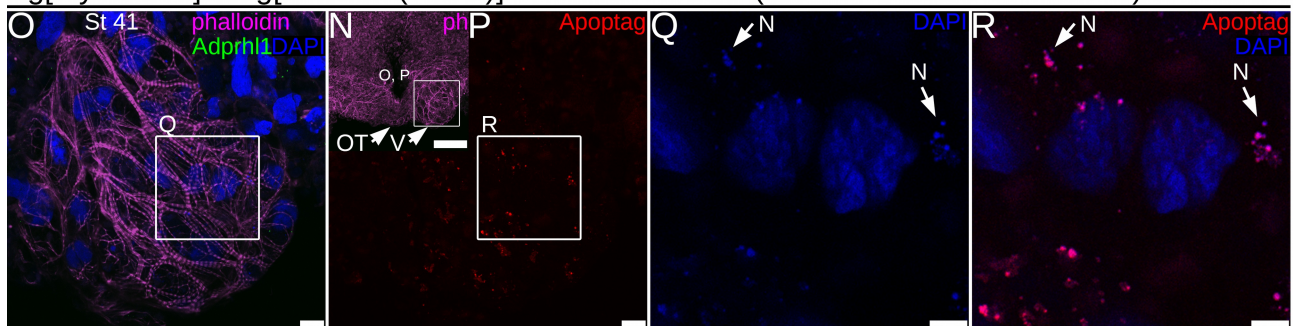

Supplement: pone.0235433.s004.pdf [file pone.0235433.s004.pdf]
