# Supplementary material for: Defective heart chamber growth and myofibrillogenesis after knockout of adprhl1 gene function by targeted disruption of the ancestral catalytic active site
Source: PubMed Central journal article supplement (PMC7390403; doi:10.1371/journal.pone.0235433), 2020-07-29

**S6.**

***Adprhl1* morpholinos - Contrast between RNA-splicing versus translation inhibition**

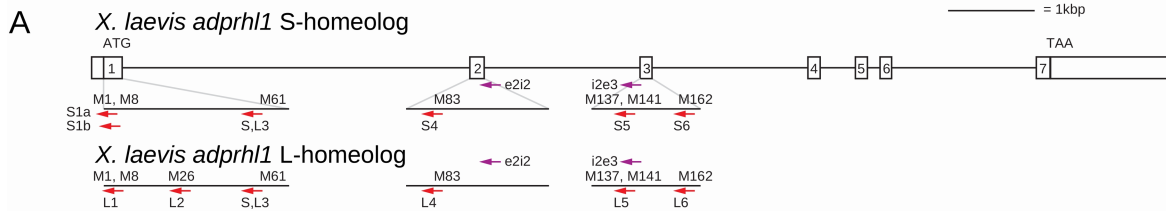

**RNA-splice interfering MOs provide a defined activity and heart phenotype**

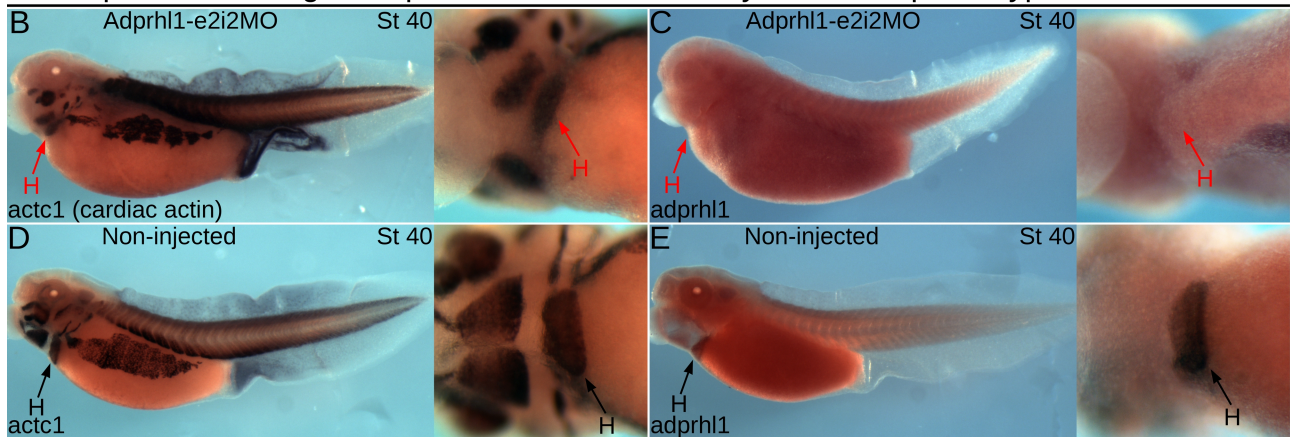

**Translation inhibition MOs produce varied effects on embryo development**

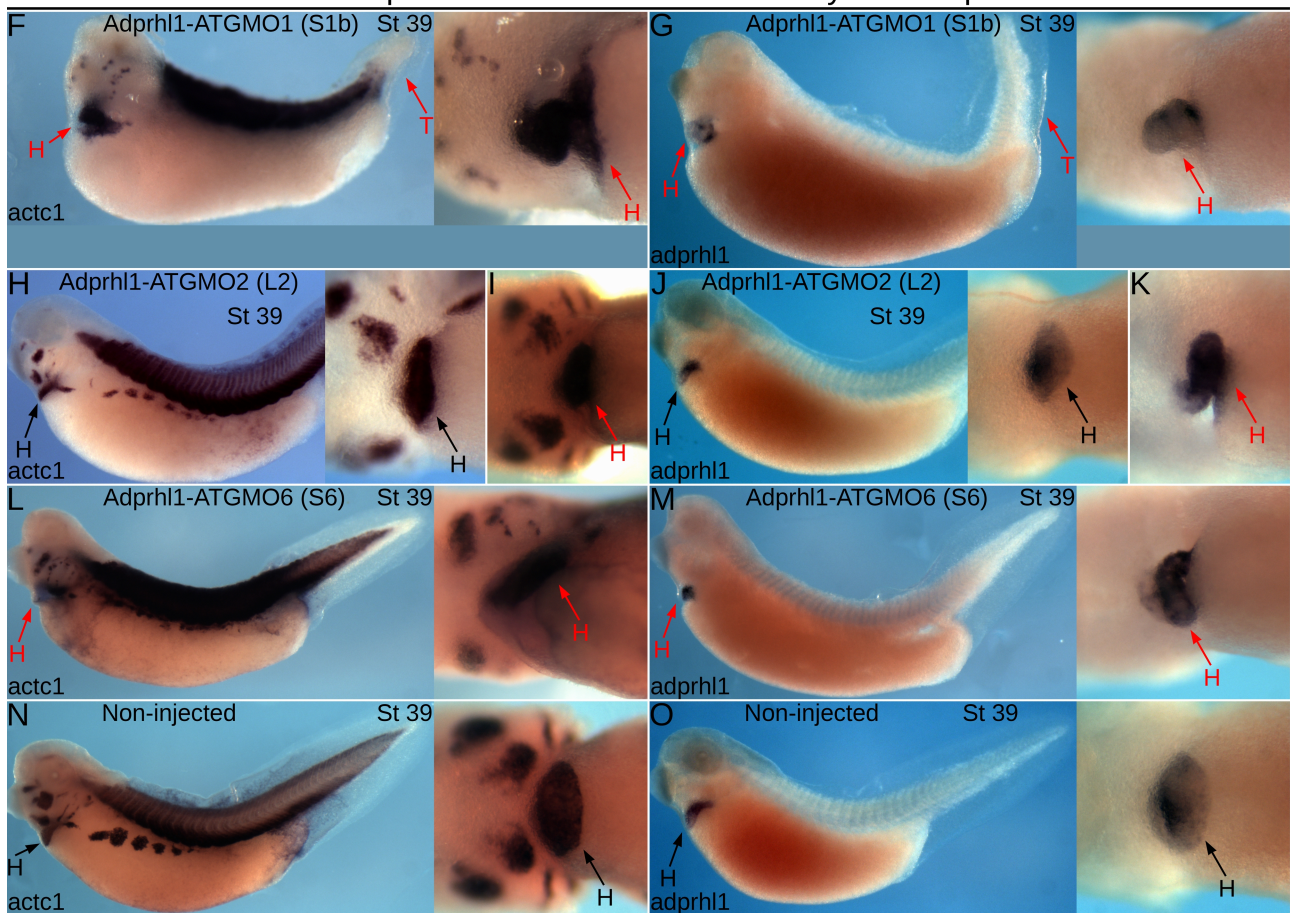

Supplement: pone.0235433.s006.pdf [file pone.0235433.s006.pdf]
