# Supplementary material for: Defective heart chamber growth and myofibrillogenesis after knockout of adprhl1 gene function by targeted disruption of the ancestral catalytic active site
Source: PubMed Central journal article supplement (PMC7390403; doi:10.1371/journal.pone.0235433), 2020-07-29

**S8.**

*Adprhl1* gRNAs - Full list of gRNA experiments and embryo phenotype frequencies

**Key**

- Heart defect 1 - inert ventricle
- Heart defect 2 - thin wall ventricle
- Other malformations
- Normal heart morphology

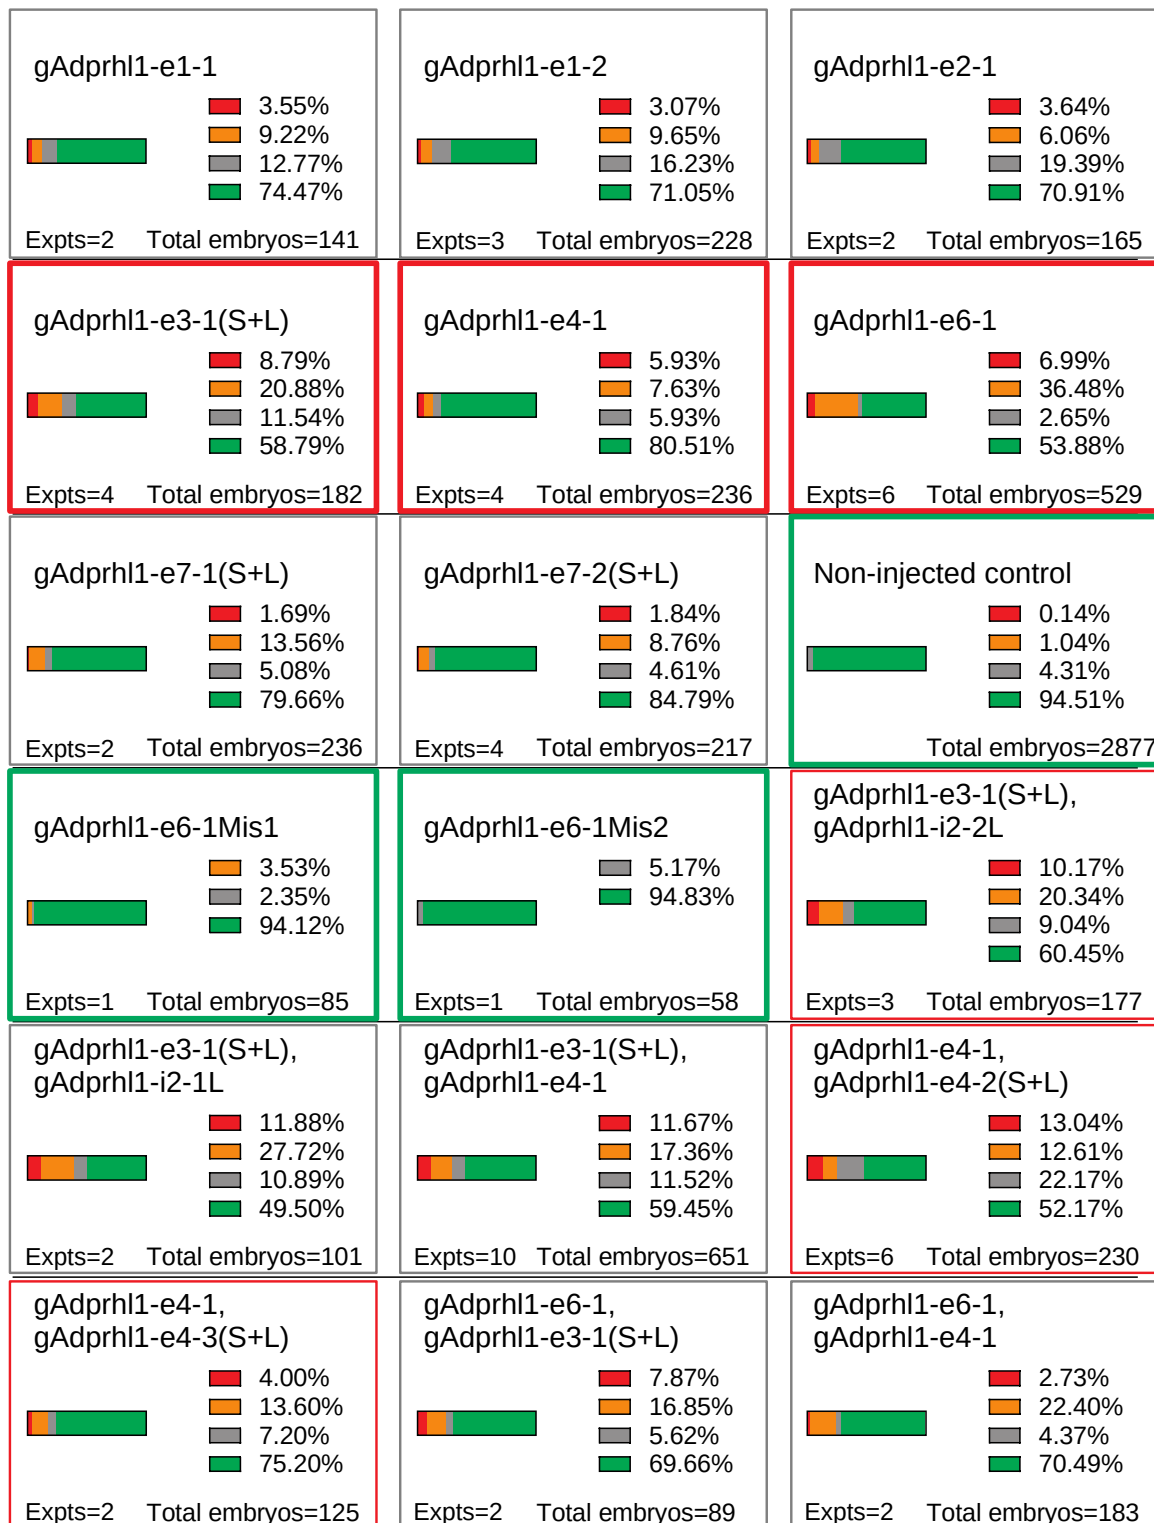

Supplement: pone.0235433.s008.pdf [file pone.0235433.s008.pdf]
