# Supplementary material for: Defective heart chamber growth and myofibrillogenesis after knockout of adprhl1 gene function by targeted disruption of the ancestral catalytic active site
Source: PubMed Central journal article supplement (PMC7390403; doi:10.1371/journal.pone.0235433), 2020-07-29

**S13.**

**Exon 4 classification of mutated *adprh1* sequences - Incomplete mutation rarely causes heart defects**

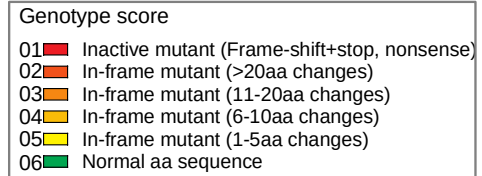

**A All sequences grouped by gRNA injection**

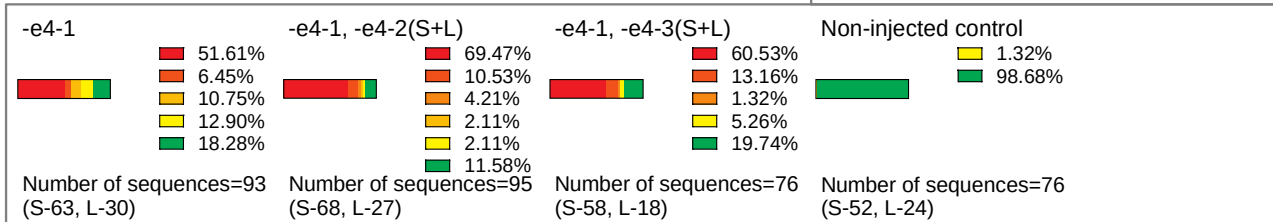

**B Sequences and mutation details of individual embryos**

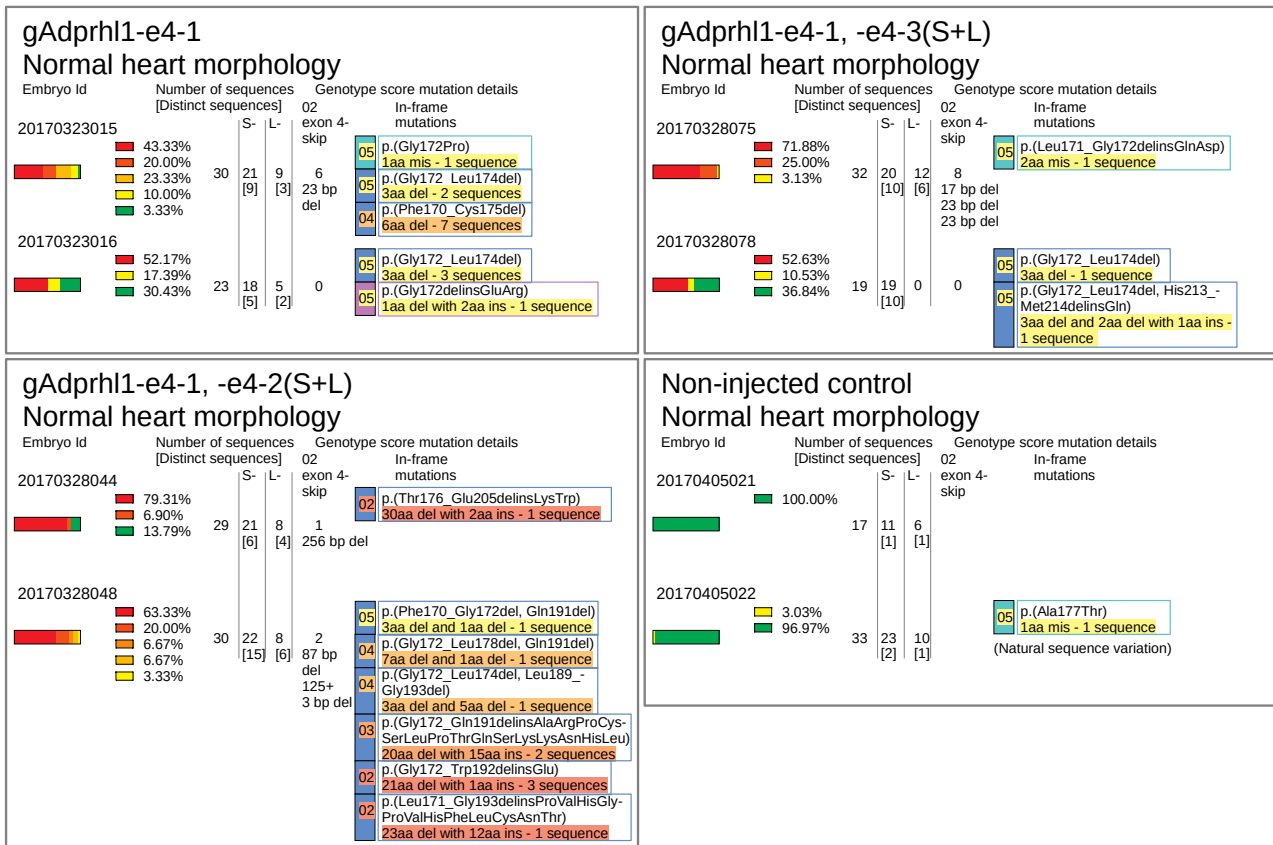

**C Exon 4 amino acid changes in  $\alpha$ -helices not associated with the active site**

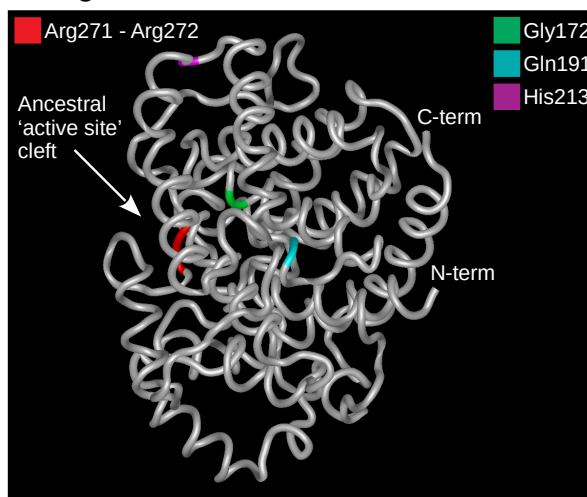

Supplement: pone.0235433.s013.pdf [file pone.0235433.s013.pdf]
