# Supplementary material for: Defective heart chamber growth and myofibrillogenesis after knockout of adprhl1 gene function by targeted disruption of the ancestral catalytic active site
Source: PubMed Central journal article supplement (PMC7390403; doi:10.1371/journal.pone.0235433), 2020-07-29

**S15.**

Range of ventricle phenotype severities observed after mutation of *adprhl1* exon 6  
gRNA: gAdprhl1-e6-1

St 44 - Strong phenotype - (Heart defect 1 - inert ventricle)

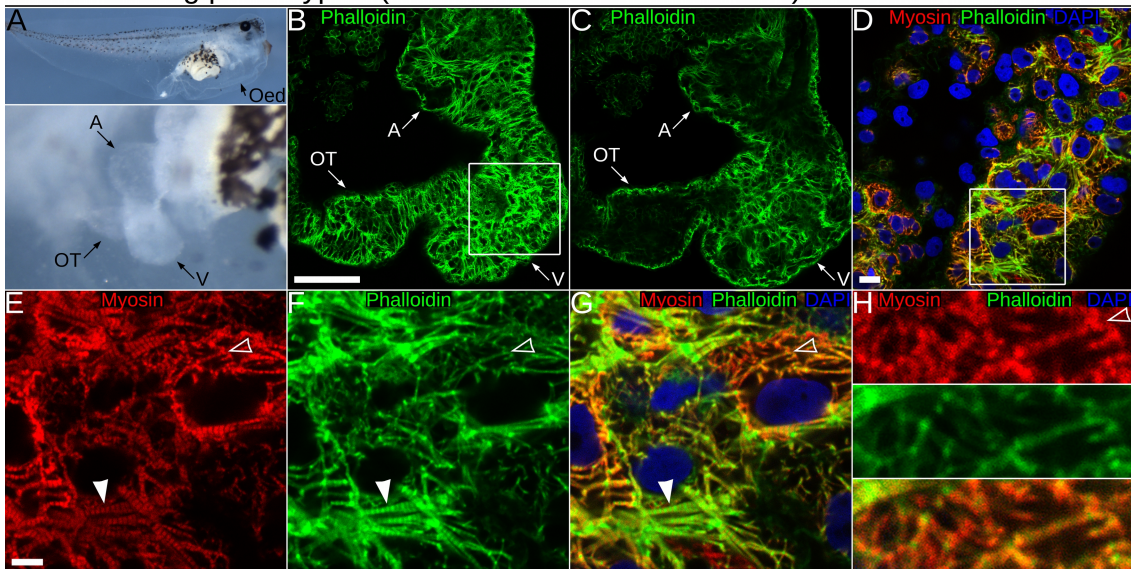

St 44 - Mildest phenotype - (Heart defect 2 - (beating) small / thin wall ventricle)

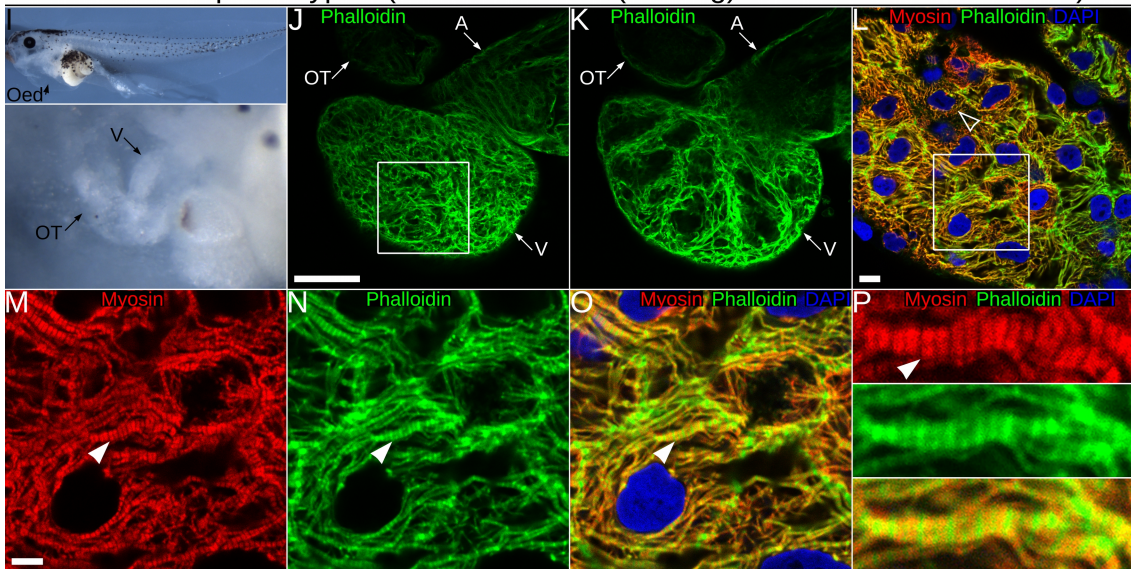

St 44 - Non-injected control

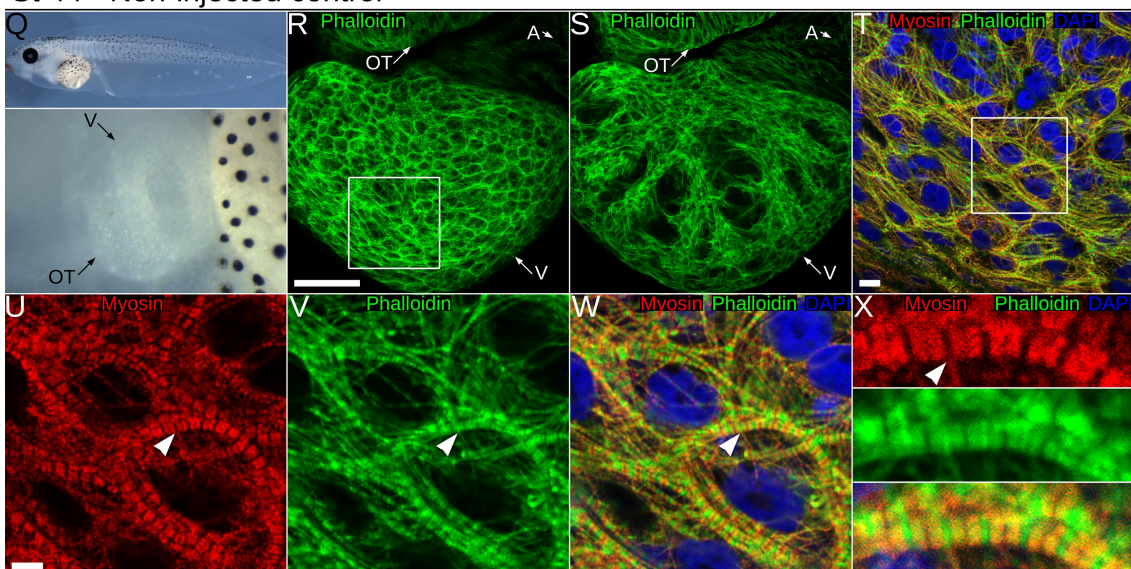

Supplement: pone.0235433.s015.pdf [file pone.0235433.s015.pdf]
