# Supplementary material for: Defective heart chamber growth and myofibrillogenesis after knockout of adprhl1 gene function by targeted disruption of the ancestral catalytic active site
Source: PubMed Central journal article supplement (PMC7390403; doi:10.1371/journal.pone.0235433), 2020-07-29

**S16.**

Mammalian *Adprhl1* transcript alignments don't predict exon 3-4 RNA-skipping

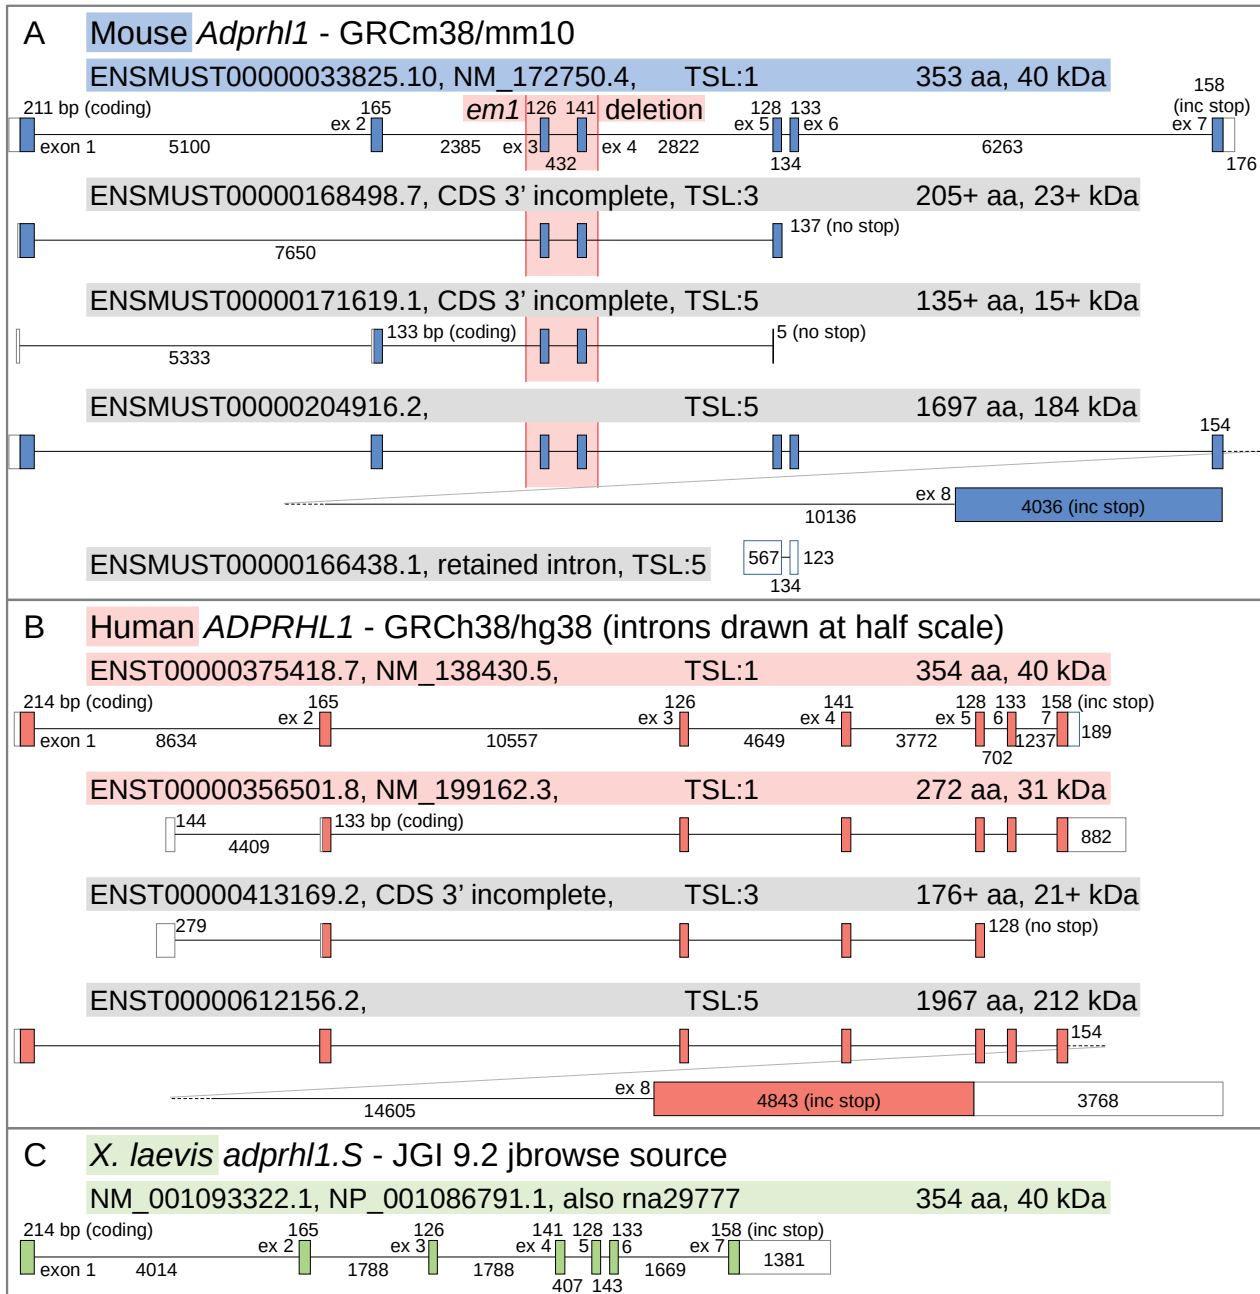

Supplement: pone.0235433.s016.pdf [file pone.0235433.s016.pdf]
