# Supplementary material for: Defective heart chamber growth and myofibrillogenesis after knockout of adprhl1 gene function by targeted disruption of the ancestral catalytic active site
Source: PubMed Central journal article supplement (PMC7390403; doi:10.1371/journal.pone.0235433), 2020-07-29

**S3 Original Images.**

**Adprh1**

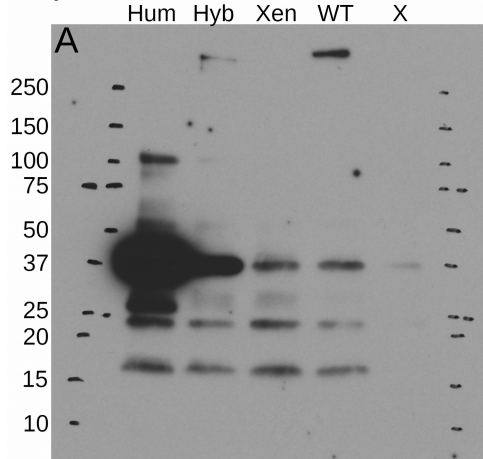

**Adprh1 (Hum)(Hyb)(Xen) (WT)**

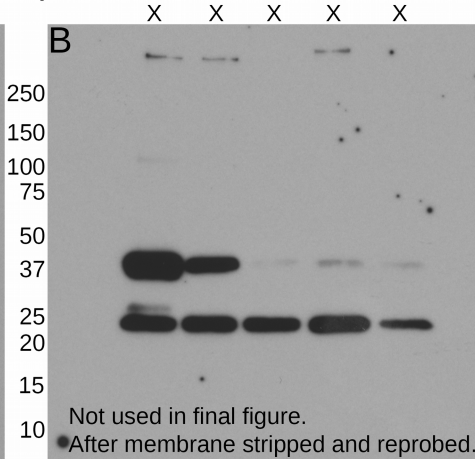

**Adprh1 Xen-**

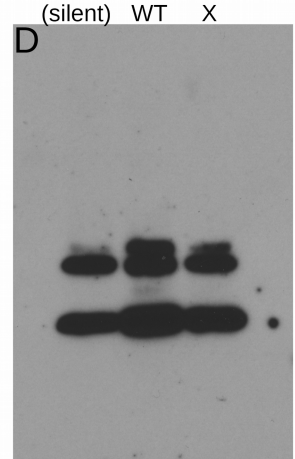

**Actin**

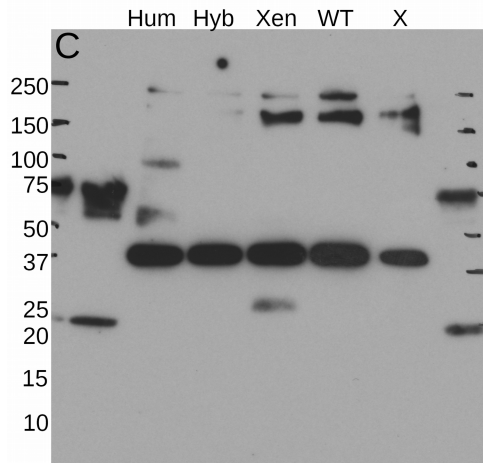

**Actin Xen-**

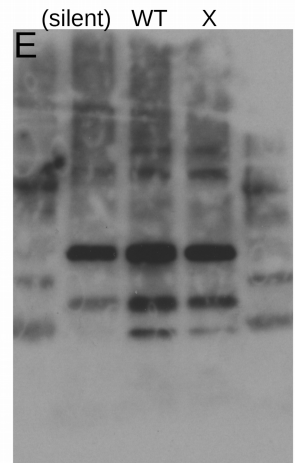

Supplement: pone.0235433.s018.pdf [file pone.0235433.s018.pdf]
